# Supplementary material for: C/EBP-Family Redundancy Determines Patient Survival and Lymph Node Involvement in PDAC
Source: MDPI journal article supplement (doi:10.3390/ijms24021537), 2023-01-12
Supplement: s1 [file s1]

# Supplementary Data

**Table S1:** Characteristics of patients included in the cohort.

| Characteristic            | <u>all patients (N=68)</u> |             | <u>C/EBP<math>\delta^{\text{low}}</math> (N=47)</u> |             | <u>C/EBP<math>\delta^{\text{high}}</math> (N=20)</u> |         |
|---------------------------|----------------------------|-------------|-----------------------------------------------------|-------------|------------------------------------------------------|---------|
|                           | N                          | %           | N                                                   | %           | N                                                    | %       |
| Median age                | 64.01                      |             | 66                                                  |             | 61                                                   |         |
| (range) (years)           | (47-83)                    |             | (47-82)                                             |             | (48-83)                                              |         |
| Sex (M/F)                 | (49/19)                    | (72.1/27.9) | (34/13)                                             | (72.3/27.6) | (15/5)                                               | (75/25) |
| Surgery                   |                            |             |                                                     |             |                                                      |         |
| PPPD                      | 60                         | 88.2        | 40                                                  | 85.1        | 19                                                   | 95      |
| Whipple-Kausch            | 8                          | 11.8        | 7                                                   | 14.9        | 1                                                    | 5       |
| Radicality                |                            |             |                                                     |             |                                                      |         |
| R0 ( $\leq 1\text{mm}$ )  | 32                         | 47.1        | 21                                                  | 44.7        | 11                                                   | 55      |
| R1 ( $\geq 1\text{mm}$ )  | 27                         | 39.7        | 20                                                  | 42.6        | 7                                                    | 35      |
| Dubious                   | 8                          | 11.8        | 6                                                   | 12.8        | 2                                                    | 10      |
| N/A                       | 1                          | 1.5         | 0                                                   | 0.0         | 0                                                    | 0       |
| Diameter post-op (cm)     |                            |             |                                                     |             |                                                      |         |
| 1-2                       | 2                          | 2.9         | 1                                                   | 2.1         | 0                                                    | 0       |
| 2-4                       | 34                         | 50.0        | 25                                                  | 53.2        | 9                                                    | 45      |
| 4-6                       | 17                         | 25.0        | 10                                                  | 21.3        | 7                                                    | 35      |
| N/A                       | 15                         | 22.1        | 11                                                  | 23.4        | 4                                                    | 20      |
| N-Stage                   |                            |             |                                                     |             |                                                      |         |
| N0                        | 15                         | 22.1        | 7                                                   | 14.9        | 8                                                    | 40      |
| N1                        | 53                         | 77.9        | 40                                                  | 85.1        | 12                                                   | 60      |
| Grading                   |                            |             |                                                     |             |                                                      |         |
| Well differentiated       | 2                          | 2.9         | 1                                                   | 2.1         | 1                                                    | 5       |
| Moderately differentiated | 18                         | 26.5        | 12                                                  | 25.5        | 6                                                    | 30      |
| Poorly differentiated     | 18                         | 26.5        | 13                                                  | 27.7        | 5                                                    | 25      |
| Undifferentiated          | 3                          | 4.4         | 2                                                   | 4.3         | 1                                                    | 5       |
| N/A                       | 27                         | 39.7        | 19                                                  | 40.4        | 7                                                    | 35      |
| Survival                  |                            |             |                                                     |             |                                                      |         |
| Median                    | 18.89                      |             | 17.35                                               |             | 22.9                                                 |         |
| (range) (months)          | (1.58-88.9)                |             | (1.58-68.11)                                        |             | (12.02-88.9)                                         |         |

**Table S1** (continued)

| Characteristic            | <b>C/EBP<math>\beta</math><sup>low</sup> (N=24)</b> |         | <b>C/EBP<math>\beta</math><sup>high</sup> (N=39)</b> |             |
|---------------------------|-----------------------------------------------------|---------|------------------------------------------------------|-------------|
|                           | N                                                   | %       | N                                                    | %           |
| Median age                | 68                                                  |         | 63                                                   |             |
| (range) (years)           | (48-82)                                             |         | (47-83)                                              |             |
| Sex (M/F)                 | (18/6)                                              | (75/25) | (29/10)                                              | (74.4/25.6) |
| Surgery                   |                                                     |         |                                                      |             |
| PPPD                      | 23                                                  | 95.8    | 33                                                   | 84.6        |
| Whipple-Kausch            | 1                                                   | 4.2     | 6                                                    | 15.4        |
| Radicality                |                                                     |         |                                                      |             |
| R0 ( $\leq 1$ mm)         | 11                                                  | 45.8    | 19                                                   | 48.7        |
| R1 ( $\geq 1$ mm)         | 10                                                  | 41.7    | 15                                                   | 38.5        |
| Dubious                   | 3                                                   | 12.5    | 4                                                    | 10.3        |
| N/A                       | 0                                                   | 0.0     | 1                                                    | 2.6         |
| Diameter post-op (cm)     |                                                     |         |                                                      |             |
| 1-2                       | 1                                                   | 4.2     | 1                                                    | 2.6         |
| 2-4                       | 13                                                  | 54.2    | 19                                                   | 48.7        |
| 4-6                       | 6                                                   | 25.0    | 11                                                   | 28.2        |
| N/A                       | 4                                                   | 16.7    | 8                                                    | 20.5        |
| N-Stage                   |                                                     |         |                                                      |             |
| N0                        | 0                                                   | 0.0     | 13                                                   | 33.3        |
| N1                        | 24                                                  | 100.0   | 26                                                   | 66.7        |
| Grading                   |                                                     |         |                                                      |             |
| Well differentiated       | 0                                                   | 0.0     | 2                                                    | 5.1         |
| Moderately differentiated | 11                                                  | 45.8    | 6                                                    | 15.4        |
| Poorly differentiated     | 8                                                   | 33.3    | 10                                                   | 25.6        |
| Undifferentiated          | 0                                                   | 0.0     | 3                                                    | 7.7         |
| N/A                       | 5                                                   | 20.8    | 18                                                   | 46.2        |
| Survival                  |                                                     |         |                                                      |             |
| Median                    | 16.33                                               |         | 18.89                                                |             |
| <b>(range) (months)</b>   | (1.58-88.9)                                         |         | (2.1-80)                                             |             |

**Table S1** (continued)

| Characteristic            | <u>C/EBP<math>\gamma</math><sup>low</sup> (N=15)</u> |             | <u>C/EBP<math>\gamma</math><sup>high</sup> (N=46)</u> |             |
|---------------------------|------------------------------------------------------|-------------|-------------------------------------------------------|-------------|
|                           | N                                                    | %           | N                                                     | %           |
| Median age                | 67                                                   |             | 63                                                    |             |
| (range) (years)           | (53-78)                                              |             | (47-83)                                               |             |
| Sex (M/F)                 | (13/2)                                               | (86.7/13.3) | (32/14)                                               | (69.6/30.4) |
| Surgery                   |                                                      |             |                                                       |             |
| PPPD                      | 15                                                   | 100.0       | 39                                                    | 84.8        |
| Whipple-Kausch            | 0                                                    | 0.0         | 7                                                     | 15.2        |
| Radicality                |                                                      |             |                                                       |             |
| R0 ( $\leq 1$ mm)         | 10                                                   | 66.7        | 19                                                    | 41.3        |
| R1 ( $\geq 1$ mm)         | 4                                                    | 26.7        | 20                                                    | 43.5        |
| Dubious                   | 1                                                    | 6.7         | 6                                                     | 13.0        |
| N/A                       | 0                                                    | 0.0         | 1                                                     | 2.2         |
| Diameter post-op (cm)     |                                                      |             |                                                       |             |
| 1-2                       | 1                                                    | 6.7         | 1                                                     | 2.2         |
| 2-4                       | 7                                                    | 46.7        | 25                                                    | 54.3        |
| 4-6                       | 6                                                    | 40.0        | 11                                                    | 23.9        |
| N/A                       | 1                                                    | 6.7         | 9                                                     | 19.6        |
| N-Stage                   |                                                      |             |                                                       |             |
| N0                        | 1                                                    | 6.7         | 11                                                    | 23.9        |
| N1                        | 14                                                   | 93.3        | 35                                                    | 76.1        |
| Grading                   |                                                      |             |                                                       |             |
| Well differentiated       | 1                                                    | 6.7         | 1                                                     | 2.2         |
| Moderately differentiated | 9                                                    | 60.0        | 8                                                     | 17.4        |
| Poorly differentiated     | 3                                                    | 20.0        | 15                                                    | 32.6        |
| Undifferentiated          | 0                                                    | 0.0         | 3                                                     | 6.5         |
| N/A                       | 2                                                    | 13.3        | 19                                                    | 41.3        |
| Survival                  |                                                      |             |                                                       |             |
| Median                    | 14                                                   |             | 21.52                                                 |             |
| (range) (months)          | (1.58-88.9)                                          |             | (2.1-80)                                              |             |

**Table S2: Correlations of *CEBPD*, *CEBPB* and *CEBPG* mRNA in publicly available RNA-sequencing datasets.** Denoted are the correlation coefficient (*r*) and the significance of the correlation. Significant correlations are denoted in bold letters.

| Data Set                         | <i>CEBPD</i> vs <i>CEBPB</i>          | <i>CEBPD</i> vs <i>CEBPG</i>           | <i>CEBPB</i> vs <i>CEBPG</i>           |
|----------------------------------|---------------------------------------|----------------------------------------|----------------------------------------|
| Janky et al. [34] (N=118)        | <b><i>r</i>=0.413, <i>p</i>=0.000</b> | <b><i>r</i>=-0.235, <i>p</i>=0.007</b> | <b><i>r</i>=-0.261, <i>p</i>=0.003</b> |
| TCGA (N=21)                      | <b><i>r</i>=0.801, <i>p</i>=0.000</b> | <b><i>r</i>=-0.557, <i>p</i>=0.006</b> | <i>r</i> =-0.421, <i>p</i> =0.058      |
| Stratford et al. [35] (N=131)    | <b><i>r</i>=0.178, <i>p</i>=0.042</b> | <b><i>r</i>=-0.187, <i>p</i>=0.033</b> | <i>r</i> =0.083, <i>p</i> =0.343       |
| Perez-Mancera et al. [36] (N=91) | <b><i>r</i>=0.497, <i>p</i>=0.000</b> | <i>r</i> =-0.227, <i>p</i> =0.030      | <i>r</i> =-0.195, <i>p</i> =0.064      |
| Zhao et al. [37] (N=82)          | <b><i>r</i>=0.582, <i>p</i>=0.000</b> | <b><i>r</i>=0.411, <i>p</i>=0.000</b>  | <b><i>r</i>=0.419, <i>p</i>=0.000</b>  |
| Bailey et al. [38] (N=70)        | <b><i>r</i>=0.366, <i>p</i>=0.002</b> | <i>r</i> =-0.119, <i>p</i> =0.327      | <i>r</i> =-0.020, <i>p</i> =0.820      |
| Guo et al. [39] (N=62)           | <b><i>r</i>=0.626, <i>p</i>=0.000</b> | <i>r</i> =-0.215, <i>p</i> =0.093      | <i>r</i> =0.0850, <i>p</i> =0.497      |
